# Supplementary material
Source: PubMed Central journal article supplement (PMC3459216)
Supplement: ijmeg0003-0213-f4.pdf [file ijmeg0003-0213-f4.pdf]

## Supplemental Files

**Supplementary Table 1.** The gene-specific assay details, including primers purchased, region examined for CpG sites, and PCR cycling conditions.

| Gene          | Primer names                           | CpG coverage region;<br>Ensembl reference<br>sequence | PCR amplicon<br>(base-pairs) | PCR conditions                                                     |
|---------------|----------------------------------------|-------------------------------------------------------|------------------------------|--------------------------------------------------------------------|
| <i>KITLG</i>  | ADS1344 FS1<br>ADS1344 FS2             | -332 to -155 from ATG;<br>ENSG00000049130             | 243                          | 95°C 15 min; 45 x (95°C 30 s;<br>53°C 30 s; 72°C 30 s); 72°C 5 min |
| <i>PDE11A</i> | ADS1346 FS1<br>ADS1346 FS2             | -743 to -618 from ATG;<br>ENSG00000128655             | 176                          | 95°C 15 min; 45 x (95°C 30 s;<br>53°C 30 s; 72°C 30 s); 72°C 5 min |
| <i>SPRY4</i>  | ADS997 FS1_re<br>ADS997 FS2            | -13 to +130 from TSS;<br>ENST00000344120              | 226                          | 95°C 15 min; 45 x (95°C 30 s;<br>45°C 30 s; 72°C 30 s); 72°C 5 min |
| <i>BAK1</i>   | ADS1345FS1<br>ADS1345FS2<br>ADS1345FS3 | -97 to +99 from TSS;<br>ENSG00000030110               | 253                          | 95°C 15 min; 45 x (95°C 30 s;<br>53°C 30 s; 72°C 30 s); 72°C 5 min |
| <i>DND1</i>   | ADS1347FS1<br>ADS1347FS2               | -254 to -82 from ATG;<br>ENSG00000183403              | 256                          | 95°C 15 min; 45 x (95°C 30 s;<br>56°C 30 s; 72°C 30 s); 72°C 5 min |

TSS = transcription start site

45 x = 45 cycles

Promoter methylation and familial testicular cancer

**Supplementary Table 2.** Mean percent methylation (standard deviation) at each CpG site in the promoter region of each gene.

| CpG* | KITLG              |           |                              | PDE11A             |            |                              | SPRY4              |           |                              | BAK1               |           |                              | DND1               |             |                              |
|------|--------------------|-----------|------------------------------|--------------------|------------|------------------------------|--------------------|-----------|------------------------------|--------------------|-----------|------------------------------|--------------------|-------------|------------------------------|
|      | % methylation (SD) |           |                              | % methylation (SD) |            |                              | % methylation (SD) |           |                              | % methylation (SD) |           |                              | % methylation (SD) |             |                              |
|      | Controls           | TGCT      | <i>P</i> <sub>wilcoxon</sub> | Controls           | TGCT       | <i>P</i> <sub>wilcoxon</sub> | Controls           | TGCT      | <i>P</i> <sub>wilcoxon</sub> | Controls           | TGCT      | <i>P</i> <sub>wilcoxon</sub> | Controls           | TGCT        | <i>P</i> <sub>wilcoxon</sub> |
| 1    | 3.1 (2.7)          | 2.7 (1.9) | 0.861                        | 17.8 (4.8)         | 19.0 (6.7) | 0.150                        | 0.7 (1.0)          | 0.9 (1.2) | 0.177                        | 1.5 (1.4)          | 2.0 (5.6) | 0.649                        | 69.8 (2.3)         | 69.5 (2.0)  | 0.214                        |
| 2    | 2.4 (1.9)          | 2.1 (1.5) | 0.129                        | 21.9 (6.4)         | 24.0 (8.8) | <b>0.026</b>                 | 1.2 (1.2)          | 1.3 (1.3) | 0.575                        | 3.3 (1.6)          | 3.1 (1.4) | 0.932                        | 75.6 (2.3)         | 75.2 (2.3)  | 0.584                        |
| 3    | 1.5 (1.6)          | 1.6 (1.5) | 0.635                        | 15.7 (5.2)         | 16.8 (6.0) | 0.081                        | 1.0 (1.2)          | 1.0 (1.3) | 0.715                        | 2.0 (1.4)          | 2.0 (1.4) | 0.745                        | 72.7 (25.3)        | 69.4 (26.3) | 0.297                        |
| 4    | 5.5 (3.6)          | 5.0 (2.6) | 0.276                        | 11.5 (3.5)         | 12.1 (4.0) | 0.328                        | 1.8 (1.7)          | 1.7 (1.8) | 0.743                        | 2.0 (1.4)          | 2.2 (1.2) | 0.252                        | 95.7 (6.0)         | 96.6 (4.3)  | 0.653                        |
| 5    | 2.5 (2.7)          | 1.8 (2.1) | <b>0.012</b>                 | 9.2 (2.6)          | 9.8 (2.9)  | 0.058                        | 4.0 (1.5)          | 4.0 (1.6) | 0.765                        | 2.5 (1.7)          | 2.6 (1.6) | 0.632                        | 62.7 (7.2)         | 63.4 (6.1)  | 0.988                        |
| 6    | 2.3 (1.4)          | 2.2 (1.1) | 0.590                        | 12.7 (3.6)         | 13.1 (4.3) | 0.420                        | 0.9 (1.4)          | 1.2 (1.7) | 0.302                        | 1.4 (1.3)          | 1.6 (1.5) | 0.090                        | 95.2 (10)          | 95.6 (4.3)  | 0.373                        |
| 7    | 3.1 (3.5)          | 2.5 (2.3) | 0.510                        | 5.9 (3.3)          | 6.1 (3.4)  | 0.458                        | 2.0 (1.5)          | 2.3 (1.6) | <b>0.027</b>                 | 1.3 (1.4)          | 1.5 (1.5) | 0.350                        | 59.9 (6.3)         | 60.2 (6.1)  | 0.798                        |
| 8    | 2.3 (2.7)          | 1.5 (1.8) | <b>0.018</b>                 |                    |            |                              | 3.1 (1.8)          | 3.1 (1.8) | 0.481                        | 2.5 (1.8)          | 2.7 (2.0) | 0.675                        | 93.6 (0.9)         | 93.5 (0.9)  | 0.707                        |
| 9    | 2.6 (3.3)          | 2.1 (2.5) | 0.447                        |                    |            |                              | 1.0 (1.2)          | 1.2 (1.8) | 0.733                        | 0.4 (0.8)          | 0.5 (1.0) | 0.148                        | 98.9 (2.1)         | 98.9 (1.4)  | 0.936                        |
| 10   | 3.1 (2.8)          | 2.8 (2.6) | 0.307                        |                    |            |                              | 2.7 (1.3)          | 2.7 (1.4) | 0.869                        | 0.7 (1.5)          | 1.0 (1.7) | 0.108                        | 87.7 (1.6)         | 87.8 (1.4)  | 0.671                        |
| 11   | 1.0 (1.3)          | 0.9 (1.4) | 0.241                        |                    |            |                              | 2.7 (2.0)          | 2.8 (1.8) | 0.642                        |                    |           |                              | 91.5 (1.4)         | 91.5 (1.7)  | 0.714                        |
| 12   | 0.6 (1.5)          | 0.4 (1.1) | 0.570                        |                    |            |                              | 0.8 (1.1)          | 1.1 (1.3) | 0.192                        |                    |           |                              | 79.8 (2.5)         | 79.8 (2.1)  | 0.751                        |
| 13   | 4.6 (1.9)          | 4.2 (1.6) | 0.106                        |                    |            |                              | 2.3 (1.3)          | 2.4 (1.5) | 0.769                        |                    |           |                              | 87.1 (1.4)         | 86.9 (1.8)  | 0.077                        |
| 14   | 5.7 (2.1)          | 5.3 (1.6) | 0.195                        |                    |            |                              | 2.1 (1.5)          | 2.3 (1.6) | 0.472                        |                    |           |                              | 91.1 (3.3)         | 90.7 (2.6)  | 0.173                        |
| 15   | 1.9 (1.2)          | 1.7 (1.0) | 0.214                        |                    |            |                              | 1.3 (1.6)          | 1.5 (1.7) | 0.216                        |                    |           |                              | 81.9 (9.1)         | 81.4 (9.3)  | 0.732                        |
| 16   | 2.0 (1.4)          | 1.9 (1.1) | 0.924                        |                    |            |                              | 3.4 (1.8)          | 3.5 (2.1) | 0.955                        |                    |           |                              |                    |             |                              |
| 17   | 3.9 (2.2)          | 3.2 (2.0) | <b>0.006</b>                 |                    |            |                              |                    |           |                              |                    |           |                              |                    |             |                              |
| 18   | 2.7 (1.9)          | 2.4 (1.9) | 0.354                        |                    |            |                              |                    |           |                              |                    |           |                              |                    |             |                              |
| 19   | 2.2 (1.3)          | 2.0 (1.1) | 0.167                        |                    |            |                              |                    |           |                              |                    |           |                              |                    |             |                              |
| 20   | 2.5 (1.3)          | 2.2 (1.1) | <b>0.024</b>                 |                    |            |                              |                    |           |                              |                    |           |                              |                    |             |                              |
| 21   | 1.6 (1.3)          | 1.5 (1.2) | 0.625                        |                    |            |                              |                    |           |                              |                    |           |                              |                    |             |                              |
| 22   | 1.9 (1.4)          | 1.6 (1.1) | 0.125                        |                    |            |                              |                    |           |                              |                    |           |                              |                    |             |                              |
| 23   | 2.5 (1.3)          | 2.6 (1.2) | 0.555                        |                    |            |                              |                    |           |                              |                    |           |                              |                    |             |                              |
| 24   | 2.5 (1.3)          | 2.4 (1.3) | 0.419                        |                    |            |                              |                    |           |                              |                    |           |                              |                    |             |                              |

\* CpGs were numbered in the order they occur in the promoter region of each gene.

Promoter methylation and familial testicular cancer

**Supplementary Table 3.** Relative risk of TGCT associated with promoter methylation levels across the promoter region and for select individual CpG sites by gene.

| Category <sup>s</sup>        | Controls<br><i>n</i> (%) | TGCT Cases<br><i>n</i> (%) | OR <sup>†</sup> (95% CI) | <i>P</i> <sub>trend</sub> |
|------------------------------|--------------------------|----------------------------|--------------------------|---------------------------|
| <b><i>KITLG</i></b>          |                          |                            |                          |                           |
| Combined levels <sup>‡</sup> |                          |                            |                          |                           |
| 1st (low)                    | 36 (32.7)                | 62 (41.6)                  | <b>2.15 (1.12, 4.14)</b> | <b>0.031</b>              |
| 2nd (middle)                 | 37 (33.6)                | 60 (40.3)                  | <b>2.15 (1.12, 4.11)</b> |                           |
| 3rd (high)                   | 37 (33.6)                | 27 (18.1)                  | 1.00 (ref)               |                           |
| CpG #5                       |                          |                            |                          | 0.061                     |
| 1st (low)                    | 36 (33.3)                | 65 (44.8)                  | 1.86 (0.98, 3.54)        |                           |
| 2nd (middle)                 | 37 (34.3)                | 49 (33.8)                  | 1.46 (0.76, 2.79)        |                           |
| 3rd (high)                   | 35 (32.4)                | 31 (21.4)                  | 1.00 (ref)               |                           |
| CpG #8                       |                          |                            |                          | 0.065                     |
| 1st (low)                    | 36 (33.3)                | 66 (45.5)                  | 1.78 (0.94, 3.37)        |                           |
| 2nd (middle)                 | 37 (34.3)                | 46 (31.7)                  | 1.18 (0.61, 2.27)        |                           |
| 3rd (high)                   | 35 (32.4)                | 33 (22.8)                  | 1.00 (ref)               |                           |
| CpG #17                      |                          |                            |                          | <b>0.022</b>              |
| 1st (low)                    | 38 (34.6)                | 70 (46.9)                  | <b>2.12 (1.13, 3.98)</b> |                           |
| 2nd (middle)                 | 36 (32.7)                | 48 (32.2)                  | 1.71 (0.89, 3.31)        |                           |
| 3rd (high)                   | 36 (32.7)                | 31 (20.8)                  | 1.00 (ref)               |                           |
| CpG #20                      |                          |                            |                          | <b>0.041</b>              |
| 1st (low)                    | 37 (33.6)                | 66 (44.3)                  | <b>1.97 (1.04, 3.73)</b> |                           |
| 2nd (middle)                 | 37 (33.6)                | 53 (35.6)                  | 1.59 (0.83, 3.04)        |                           |
| 3rd (high)                   | 36 (32.7)                | 30 (20.1)                  | 1.00 (ref)               |                           |
| <b><i>PDE11A</i></b>         |                          |                            |                          |                           |
| Combined levels              |                          |                            |                          |                           |
| 1st (low)                    | 36 (33.0)                | 34 (22.5)                  | 1.00 (ref)               | <b>0.042</b>              |
| 2nd (middle)                 | 38 (34.9)                | 54 (35.8)                  | 1.55 (0.82, 2.93)        |                           |
| 3rd (high)                   | 35 (32.1)                | 63 (41.7)                  | <b>1.94 (1.03, 3.65)</b> |                           |
| CpG #2                       |                          |                            |                          | <b>0.049</b>              |
| 1st (low)                    | 36 (33.0)                | 32 (21.2)                  | 1.00 (ref)               |                           |
| 2nd (middle)                 | 38 (34.9)                | 58 (38.4)                  | 1.69 (0.90, 3.19)        |                           |
| 3rd (high)                   | 35 (32.1)                | 61 (40.4)                  | <b>1.94 (1.02, 3.67)</b> |                           |
| CpG #5                       |                          |                            |                          | <b>0.010</b>              |
| 1st (low)                    | 36 (33.0)                | 34 (22.5)                  | 1.00 (ref)               |                           |
| 2nd (middle)                 | 38 (34.9)                | 47 (31.1)                  | 1.43 (0.75, 2.73)        |                           |
| 3rd (high)                   | 35 (32.1)                | 70 (46.4)                  | <b>2.27 (1.21, 4.27)</b> |                           |
| <b><i>SPRY4</i></b>          |                          |                            |                          |                           |
| Combined levels              |                          |                            |                          |                           |
| 1st (low)                    | 38 (33.3)                | 46 (30.9)                  | 1.00 (ref)               | 0.353                     |
| 2nd (middle)                 | 39 (34.2)                | 44 (29.5)                  | 0.90 (0.49, 1.67)        |                           |
| 3rd (high)                   | 37 (32.5)                | 59 (39.6)                  | 1.32 (0.72, 2.40)        |                           |
| CpG #7                       |                          |                            |                          |                           |

Promoter methylation and familial testicular cancer

|                 |           |           |                          |              |
|-----------------|-----------|-----------|--------------------------|--------------|
| 1st (low)       | 37 (33.6) | 35 (23.9) | 1.00 (ref)               |              |
| 2nd (middle)    | 37 (34.6) | 49 (33.6) | 1.53 (0.81, 2.91)        |              |
| 3rd (high)      | 36 (32.8) | 62 (42.5) | <b>1.99 (1.06, 3.76)</b> | <b>0.033</b> |
| <b>BAK1</b>     |           |           |                          |              |
| Combined levels |           |           |                          |              |
| 1st (low)       | 38 (33.3) | 38 (25.2) | 1.00 (ref)               |              |
| 2nd (middle)    | 39 (34.2) | 46 (30.4) | 1.24 (0.66, 2.32)        |              |
| 3rd (high)      | 37 (32.5) | 67 (44.4) | <b>1.86 (1.01, 3.42)</b> | <b>0.042</b> |

*n*, number of subjects (percent of subjects);

† odds ratios (95% confidence intervals), adjusted for age;

§ categorized into tertiles based on the distribution in controls;

‡ for the average % methylation across the entire promoter CpG island.

Promoter methylation and familial testicular cancer

**Supplemental Table 4.** Relative risk of TGCT by type associated with average promoter methylation.

| Tumor type          | Controls<br><i>n</i> (%) | TGCT cases<br><i>n</i> (%) | OR <sup>†</sup> (95% CI) | <i>P</i> value |
|---------------------|--------------------------|----------------------------|--------------------------|----------------|
| <b>Seminoma</b>     |                          |                            |                          |                |
| <i>KITLG</i>        |                          |                            |                          |                |
| Low <sup>§</sup>    | 55 (50.0)                | 48 (68.6)                  | 2.19 (1.16, 4.128)       | <b>0.015</b>   |
| High                | 55 (50.0)                | 22 (31.4)                  | 1.00 (ref)               |                |
| <i>PDE11A</i>       |                          |                            |                          |                |
| Low                 | 55 (50.5)                | 30 (41.7)                  | 1.00 (ref)               | 0.25           |
| High                | 54 (49.5)                | 42 (58.3)                  | 1.42 (0.78, 2.59)        |                |
| <i>SPRY4</i>        |                          |                            |                          |                |
| Low                 | 57 (50.0)                | 34 (47.2)                  | 1.00 (ref)               | 0.73           |
| High                | 57 (50.0)                | 38 (52.8)                  | 1.12 (0.62, 2.01)        |                |
| <i>BAK1</i>         |                          |                            |                          |                |
| Low                 | 57 (50.0)                | 25 (34.7)                  | 1.00 (ref)               | <b>0.041</b>   |
| High                | 57 (50.0)                | 47 (65.3)                  | 1.89 (1.03, 3.47)        |                |
| <i>DND1</i>         |                          |                            |                          |                |
| Low                 | 57 (50.0)                | 50 (67.6)                  | 2.08 (1.13, 3.83)        | <b>0.019</b>   |
| High                | 57 (50.0)                | 24 (32.4)                  | 1.00 (ref)               |                |
| <b>Non-seminoma</b> |                          |                            |                          |                |
| <i>KITLG</i>        |                          |                            |                          |                |
| Low                 | 55 (50.0)                | 47 (62.7)                  | 1.37 (0.73, 2.56)        | 0.33           |
| High                | 55 (50.0)                | 28 (37.3)                  | 1.00 (ref)               |                |
| <i>PDE11A</i>       |                          |                            |                          |                |
| Low                 | 55 (50.5)                | 28 (37.3)                  | 1.00 (ref)               | 0.09           |
| High                | 54 (49.5)                | 47 (62.7)                  | 1.68 (0.91, 3.12)        |                |
| <i>SPRY4</i>        |                          |                            |                          |                |
| Low                 | 57 (50.0)                | 32 (43.8)                  | 1.00 (ref)               | 0.50           |
| High                | 57 (50.0)                | 41 (56.2)                  | 1.23 (0.67, 2.26)        |                |
| <i>BAK1</i>         |                          |                            |                          |                |
| Low                 | 57 (50.0)                | 31 (41.3)                  | 1.00 (ref)               | 0.18           |
| High                | 57 (50.0)                | 44 (58.7)                  | 1.53 (0.83, 2.80)        |                |
| <i>DND1</i>         |                          |                            |                          |                |
| Low                 | 57 (50.0)                | 38 (51.4)                  | 0.93 (0.51, 1.71)        | 0.81           |
| High                | 57 (50.0)                | 36 (48.6)                  | 1.00 (ref)               |                |

<sup>§</sup> average % methylation across the entire promoter CpG island dichotomized at the median, based on the distribution in controls for each gene;

*n*, number of subjects (percent of subjects);

<sup>†</sup> odds ratios (95% confidence intervals), adjusted for age.
